# Supplementary material
Source: Research Square preprint supplement (doi:10.21203/rs.3.rs-9180770/v1)
Supplement: Supplementary file 1 [file 28f6dae164341736934276f8.docx]

**Bi2Fe4O9/reduced graphene oxide nanocomposites with enhanced peroxidase activity for sensitive glutathione detection**

Jinxiu Guoa, b, *, Haozhe Jiaa, c, Runtian Maa, b, Zuoxiang Maa, Yanjun Cuia, Bing Hua, Zhifang Zhanga，Haijiao Xie d

a College of Science, Gansu Agricultural University, Lanzhou 730070, China

b Key Laboratory of Eco-functional Polymer Materials, Northwest Normal University, Lanzhou 730070, China

c School of Chemistry and Chemical Engineering, Southwest Petroleum University, Chengdu 610500, China

d Hangzhou Yanqu Information Technology Co., Ltd., Hangzhou 310003, China

**Corresponding authors:**

Jinxiu Guo

E-mail: guojx@gsau.edu.cn

**
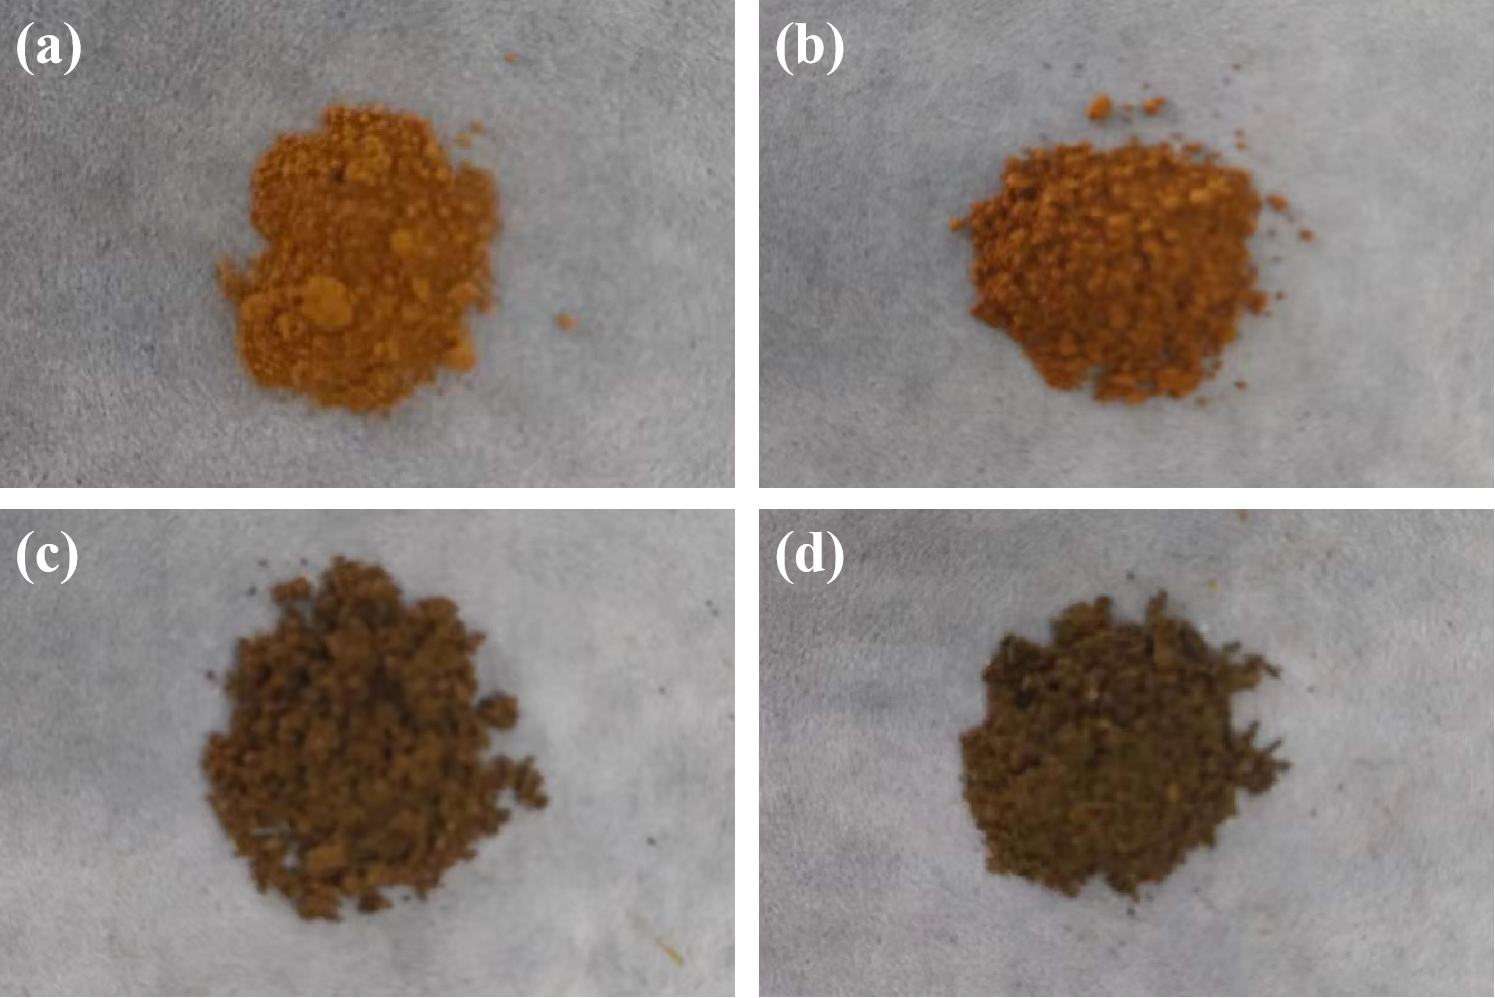
**

**Fig. S1** The photographs of (a) Bi2Fe4O9/rGO-50, (b) Bi2Fe4O9/rGO-100, (c) Bi2Fe4O9/rGO-200 and (d) Bi2Fe4O9/rGO-400


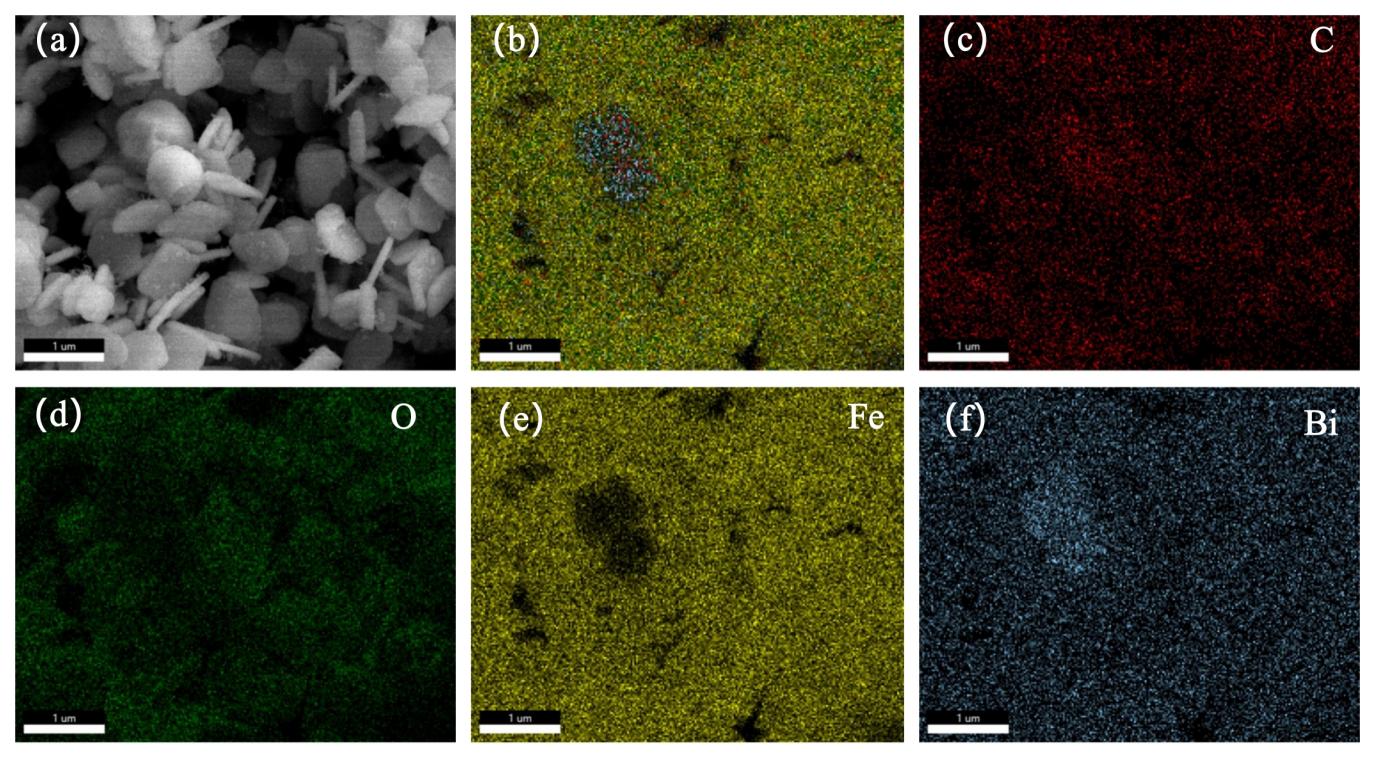


**Fig. S2** (a) SEM image and the corresponding elemental mapping results of Bi2Fe4O9/rGO-100: (b) element overlay, (c) C, (d) O, (e) Fe and (f) Bi

**
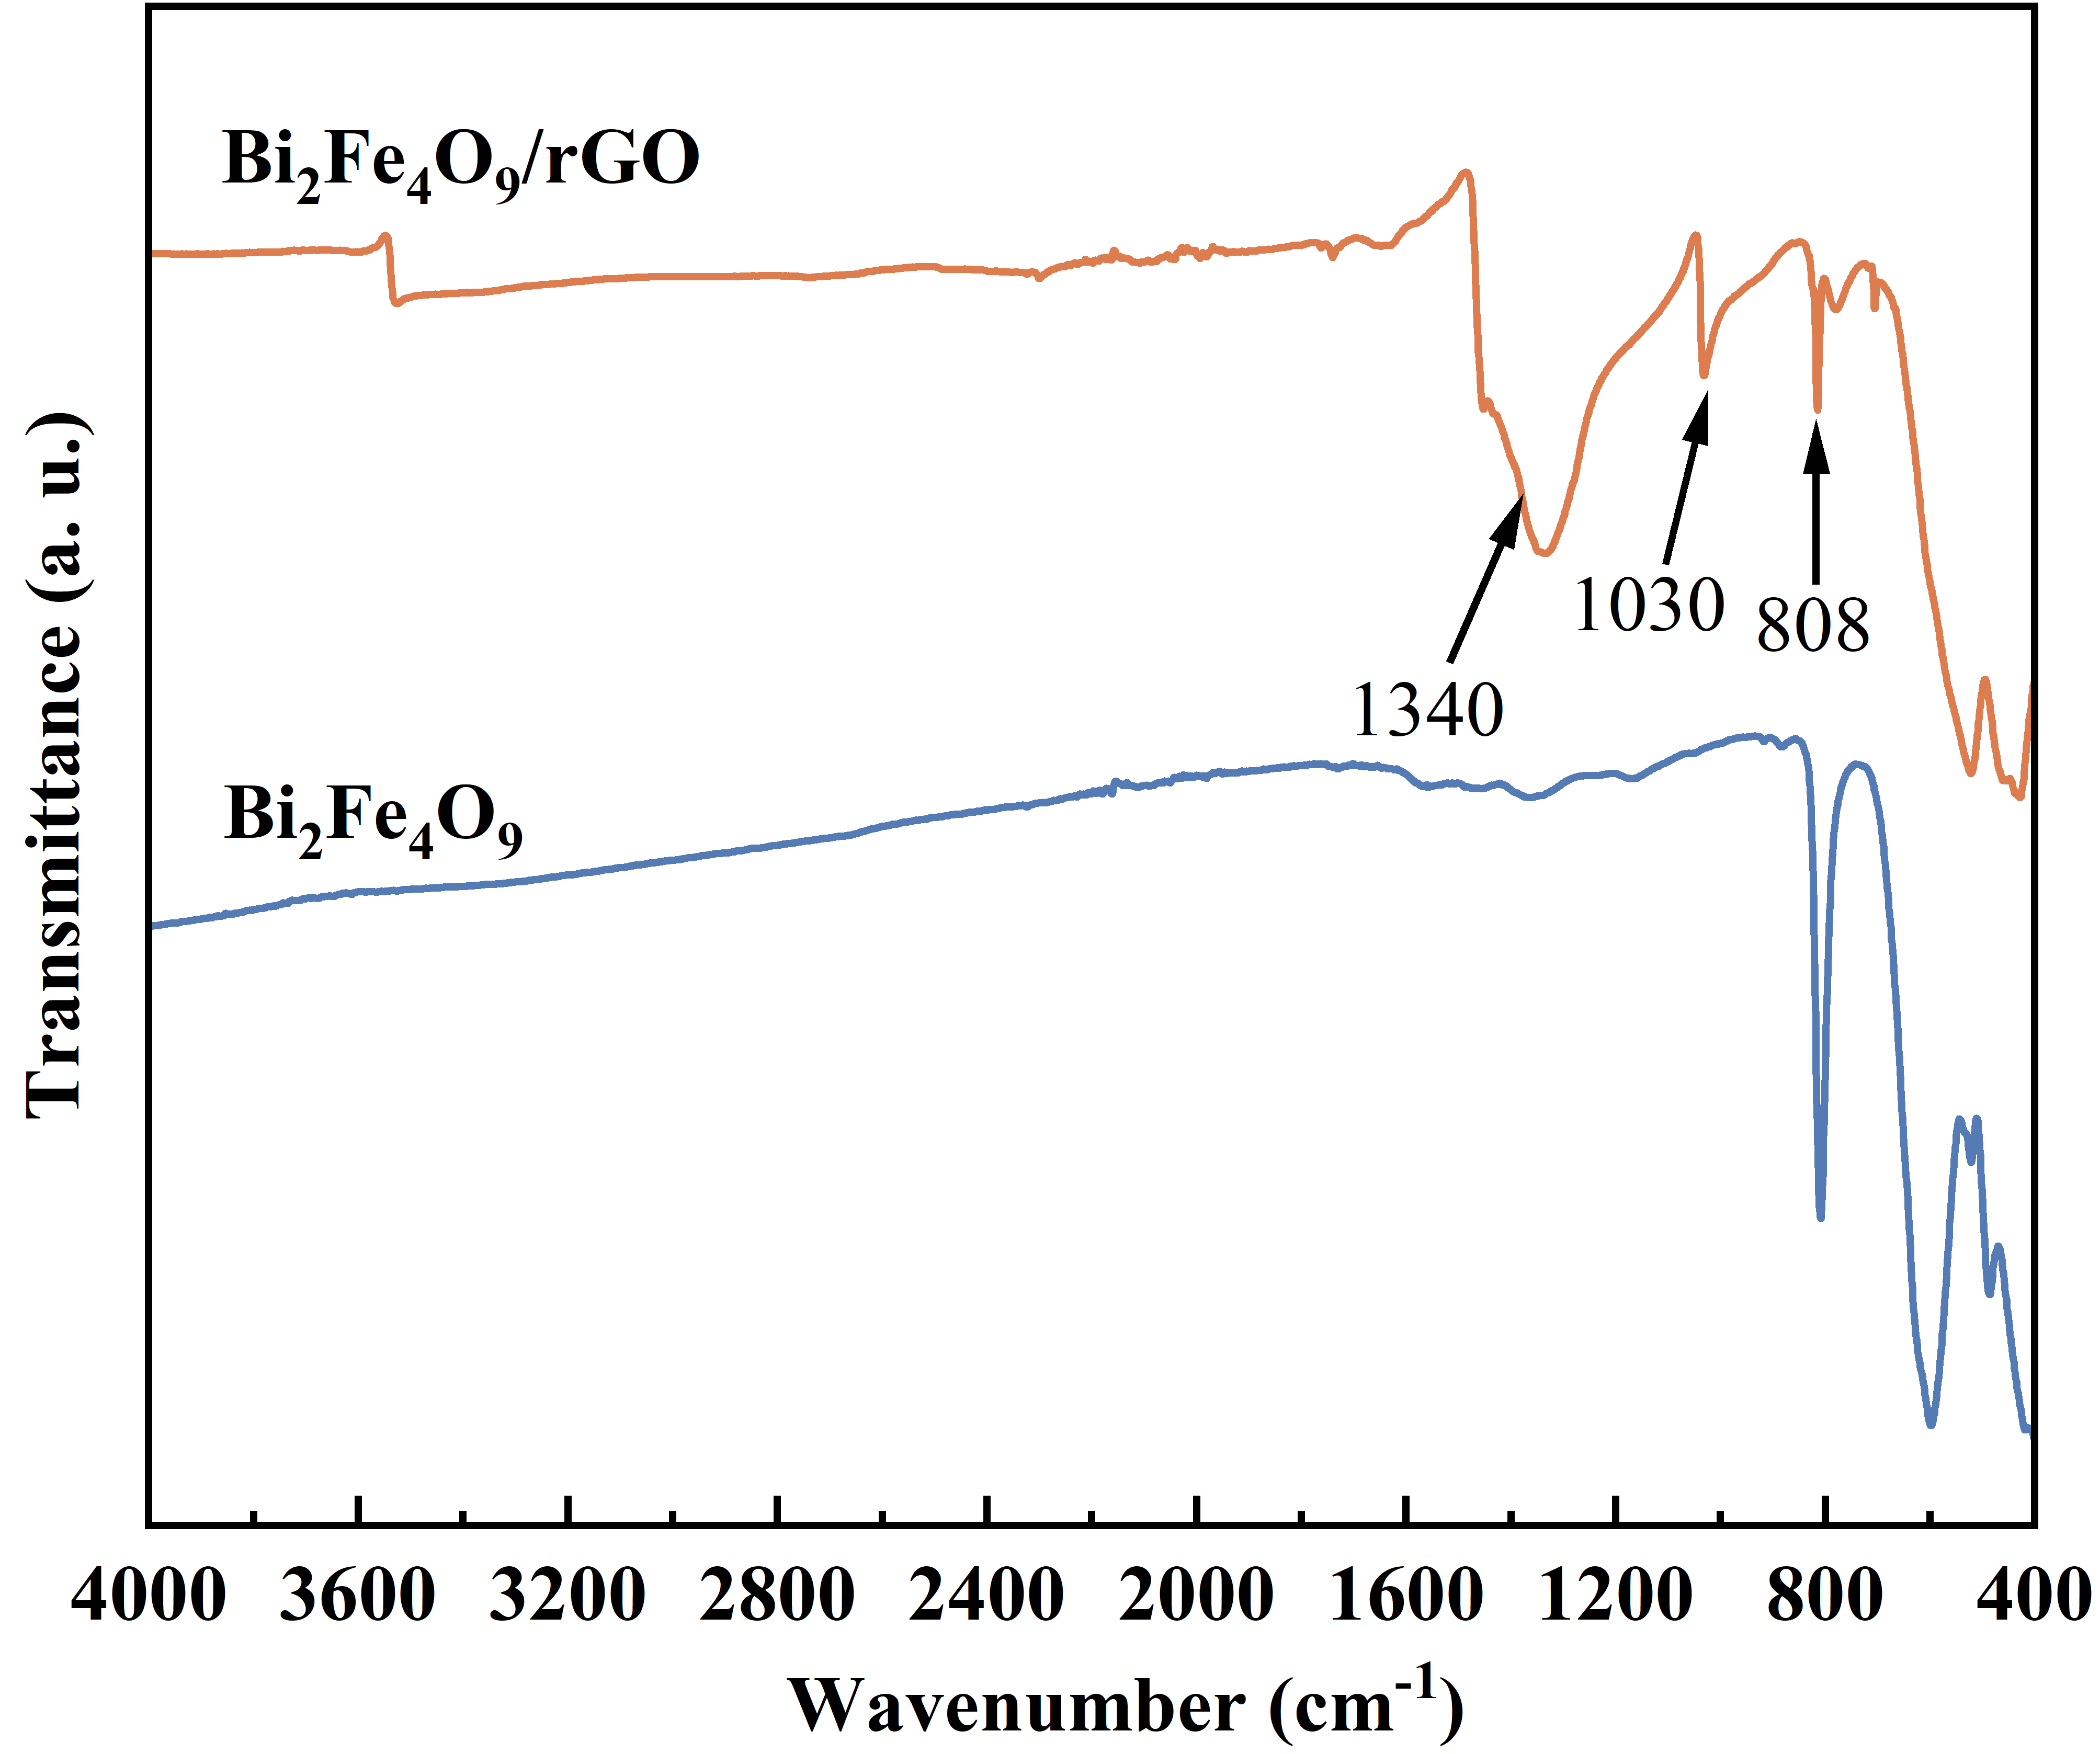
**

**Fig. S3** FTIR spectra of Bi2Fe4O9 NPs and Bi2Fe4O9/rGO NCs


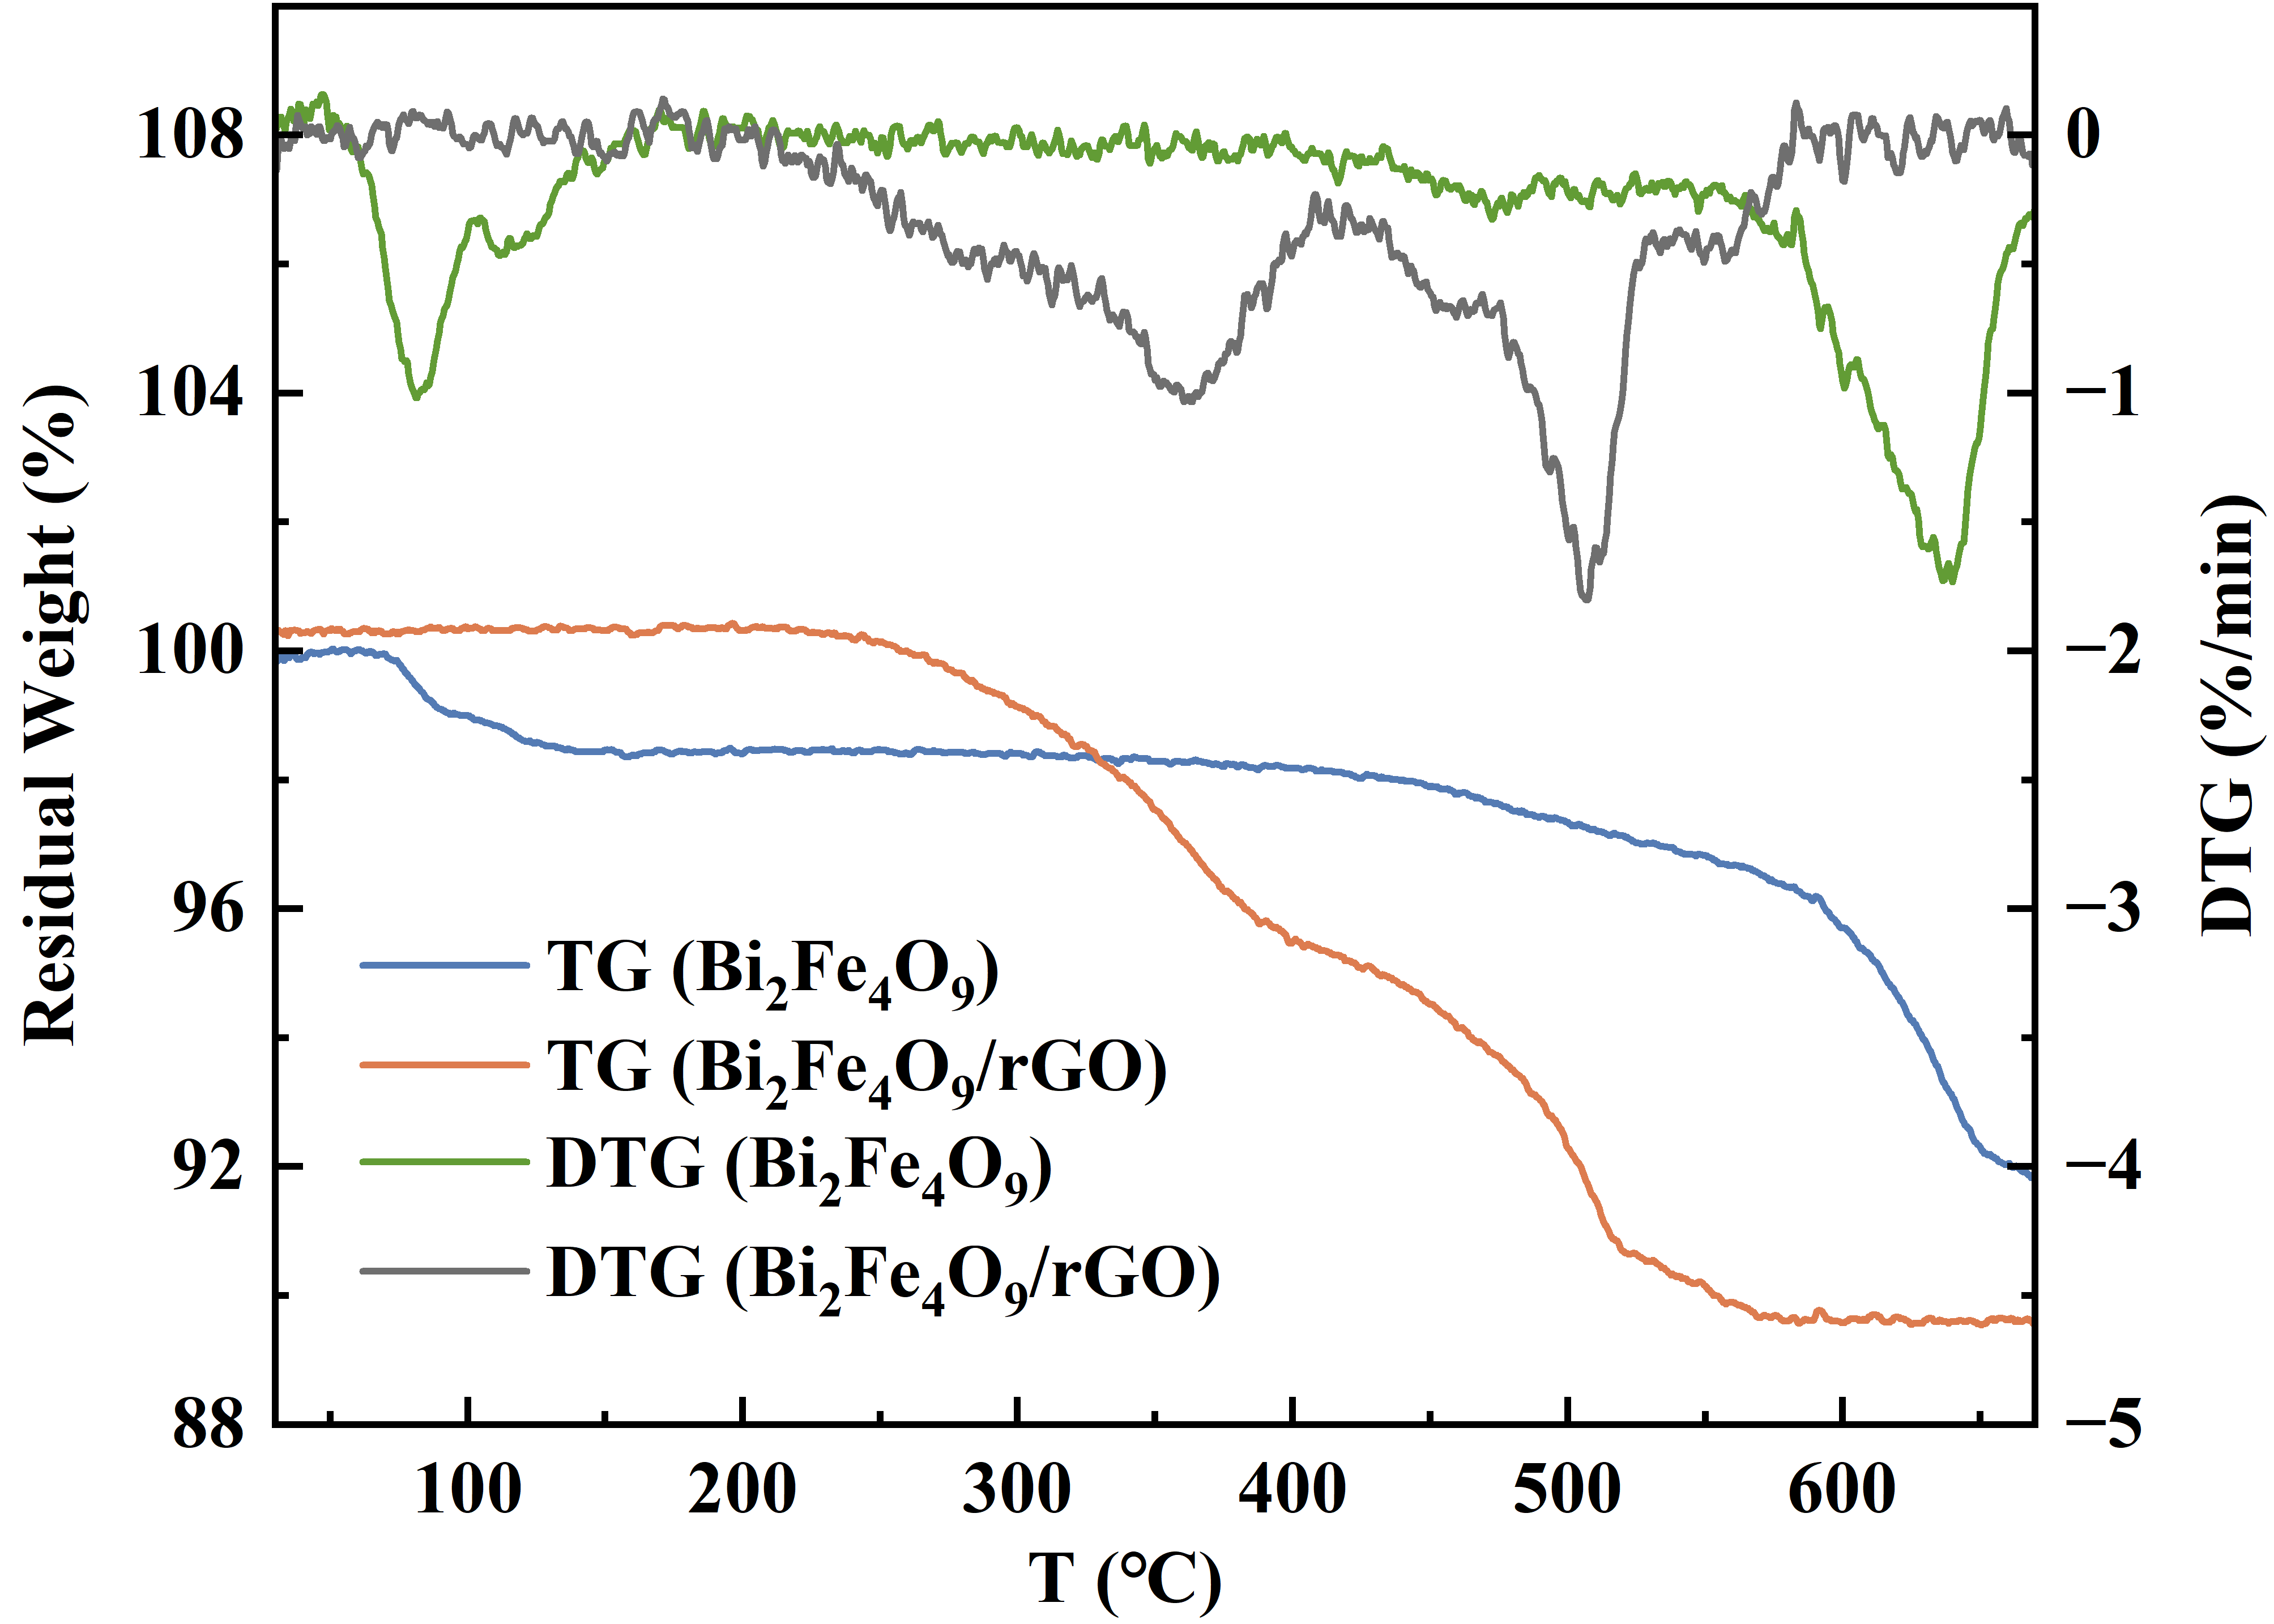


**Fig. S4** TG and DTG curves of Bi2Fe4O9 NPs and Bi2Fe4O9/rGO NCs


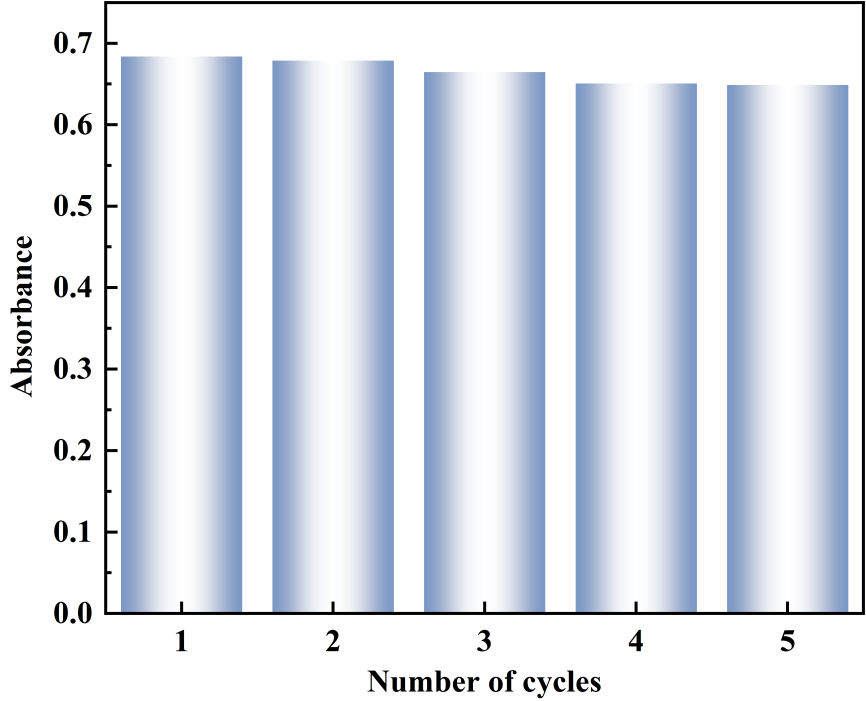


**Fig. S5** TG and DTG curves of Bi2Fe4O9 NPs and Bi2Fe4O9/rGO NCs


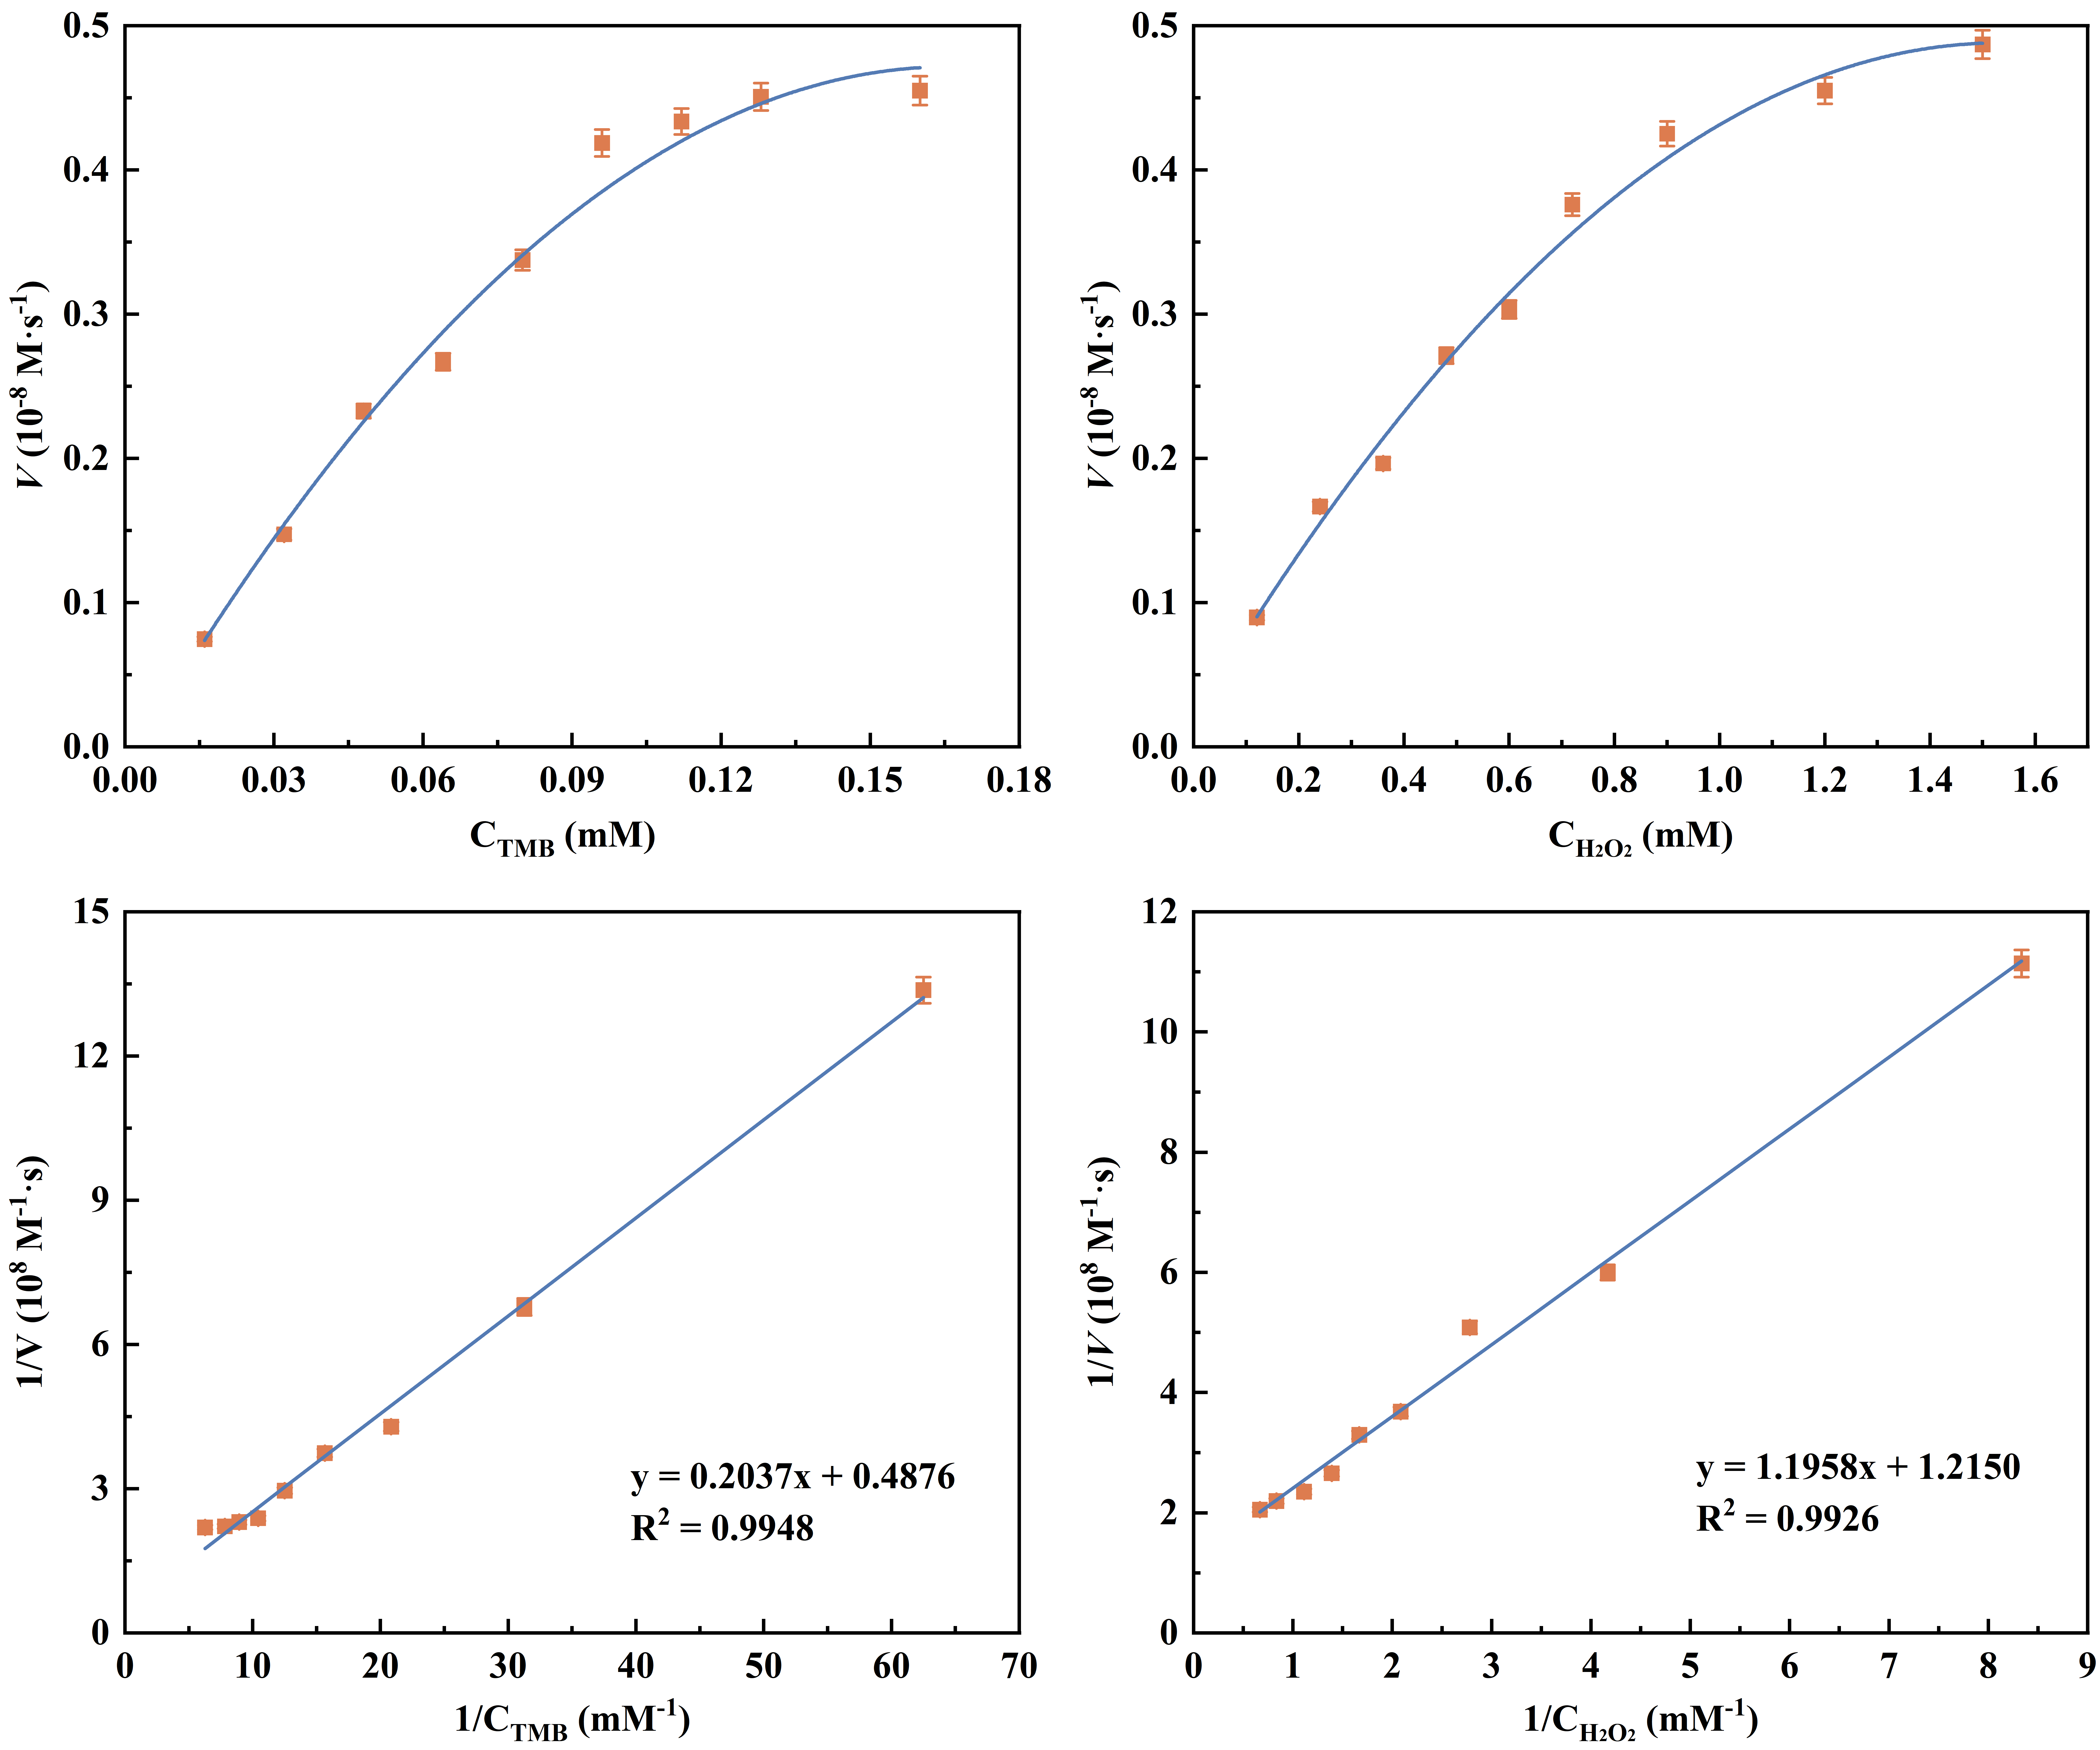


**Fig. S6** Michaelis-Menten curves of Bi2Fe4O9 with (a) TMB and (b) H2O2 used as substrate, Lineweaver–Burk plots of Bi2Fe4O9 from the activity data of the varied concentration of (c) TMB and (d) H2O2

**Table S1** Comparison of kinetic parameters of Bi2Fe4O9/rGO and HRP or other nanozymes

| Catalysts | Km (mM) | | | Vmax (10-8 M·s-1) | | Ref. |
| --- | --- | --- | --- | --- | --- | --- |
| TMB | H2O2 | TMB | | H2O2 |
| HRP | 0.43 | 3.7 | 10.00 | | 8.71 | [1] |
| Fe3O4 | 0.098 | 154 | 3.44 | | 9.78 | [1] |
| GO-Fe3O4 | 0.43 | 0.71 | 13.08 | | 5.31 | [2] |
| CoFe2O4 | 0.007 | 0.036 | -a | | - | [3] |
| rGO-CoFe2O4 | 0.046 | 14.72 | 1.12 | | 21.71 | [4] |
| ZnFe2O4 | 0.85 | 1.66 | 13.31 | | 7.74 | [5] |
| ZnFe2O4/rGO | 0.12 | 0.06 | 4.15 | | 2.61 | [6] |
| GO-COOH | 0.0237 | 3.99 | 3.45 | | 3.85 | [7] |
| Bi2Fe4O9 | 0.07 | 0.73 | 2.17 | | 1.56 | [8] |
| Bi2Fe4O9 | 0.42 | 0.98 | 2.05 | | 0.82 | This work |
| Bi2Fe4O9/rGO | 0.09 | 0.24 | 3.23 | | 1.93 | This work |

a“-” indicates the data were not reported in the cited reference.

**Table S2** Comparison of the analytical performance of GSH with Bi2Fe4O9/rGO and different peroxidase mimics

| Peroxidase mimics | Linear Range(μM) | LOD (nM) | Ref. |
| --- | --- | --- | --- |
| Fe3O4 | 3-30 | -a | [9] |
| GO-Fe3O4 | 0.1-10 | 9.17 | [10] |
| ZnFe2O4/rGO | 2-40 | 760 | [6] |
| MnCe0.1 | 2.5-20 | 370 | [11] |
| Cu@Co-MOFs | 1-1200 | 720 | [12] |
| MOF-Fe(DTNB) | 0-80 | 280 | [13] |
| KV6O15/V2O5 | 0.1-35 | 38.8 | [14] |
| MoSe2@Fe | 1.67-33.3 | 3070 | [15] |
| Bi2Fe4O9/rGO | 0.01-0.25 | 3.1 | This work |

a“-” indicates the data were not reported in the cited reference.

**References**

[1] Gao L, Zhuang J, Nie L, et al (2007) Intrinsic peroxidase-like activity of ferromagnetic nanoparticles. Nature Nanotechnology 2 (9): 577-583. https://doi.org/10.1038/nnano.2007.260

[2] Dong Y, Zhang H, Rahman ZU, et al (2012) Graphene oxide-Fe3O4 magnetic nanocomposites with peroxidase-like activity for colorimetric detection of glucose. Nanoscale 4 (13):3969-3976. https://doi.org/3969-3976.10.1039/c2nr12109c

[3] Zhang K, Zuo W, Wang Z, et al (2015) A simple route to CoFe2O4 nanoparticles with shape and size control and their tunable peroxidase-like activity. RSC Advances 5 (14): 10632-10640. https://doi.org/10.1039/c4ra15675g

[4] Hao J, Zhang Z, Yang W, et al (2013) In situ controllable growth of CoFe2O4 ferrite nanocubes on graphene for colorimetric detection of hydrogen peroxide. Journal of Materials Chemistry A 1 (13): 4352-4357. https://doi.org/10.1039/10.1039/c3ta00774j

[5] Su L, Feng J, Zhou X, et al (2012) Colorimetric detection of urine glucose based ZnFe2O4 magnetic nanoparticles. Analytical Chemistry 84 (13): 5753-5758. https://doi.org/10.1021/ac300939z

[6] Bian B, Liu Q, Yu S (2019) Peroxidase mimetic activity of porphyrin modified ZnFe2O4/reduced graphene oxide and its application for colorimetric detection of H2O2 and glutathione. Colloids and Surfaces B: Biointerfaces 181: 567-575. https://doi.org/10.1016/j.colsurfb.2019.06.008

[7] Song Y, Qu K, Zhao C, et al (2010) Graphene oxide: intrinsic peroxidase catalytic activity and its application to glucose detection. Advanced Materials 22 (19): 2206-2210.

[8] Razavi M, Barras A, Ifires M, et al (2022) Colorimetric assay for the detection of dopamine using bismuth ferrite oxide (Bi2Fe4O9) nanoparticles as an efficient peroxidase-mimic nanozyme. Journal of Colloid and Interface Science 613: 384-395. https://doi.org/10.1016/j.jcis.2022.01.041

[9] Ma Y, Zhang Z, Ren C, et al (2012) A novel colorimetric determination of reduced glutathione in A549 cells based on Fe3O4 magnetic nanoparticles as peroxidase mimetics. Analyst 137 (2): 485-489. https://doi.org/10.1039/C1AN15718C

[10] Mei L, Wei B, Liu C, et al (2025) Polyvinylpyrrolidone-stabilized ultra-small Fe3O4 nanoparticles-functionalized graphene oxide with synergistically enhanced peroxidase-like activity for glutathione colorimetric determination in rat serum. Microchimica Acta 192 (4): 250. https://doi.org/10.1007/s00604-025-07044-w

[11] Yao J, Li C, Feng J, et al (2024) Mn-doped CeO2 nanorods for the colorimetric sensing of glutathione. ACS Applied Nano Materials 7 (24): 28242-28254. https://doi.org/10.1021/acsanm.4c05215

[12] Gu Y, Han J, Zhang N, et al (2024) Bimetallic Cu@ Co-MOFs mimic peroxidase for colorimetric detection of glutathione. ACS Applied Nano Materials 7 (21): 24683-24696. https://doi.org/10.1021/acsanm.4c04563

[13] Zhang K, Sun H, Wei L, et al (2025) Robust and sensitive colorimetric detection of glutathione with double-triggering MOF-Fe (DTNB). Spectrochimica Acta Part A: Molecular and Biomolecular Spectroscopy 328: 125439. https://doi.org/10.1016/j.saa.2024.125439

[14] Mao H, Wang M, Wang H, et al (2024) Oxygen vacancy and heterojunction co-boosted peroxidase-like activity of KV6O15/V2O5 nanoribbons for the colorimetric detection of glutathione. Microchemical Journal 204: 111091. https://doi.org/10.1016/j.microc.2024.111091

[15] Lin L, Chen D, Lu C, et al (2022) Fluorescence and colorimetric dual-signal determination of Fe3+ and glutathione with MoSe2@Fe nanozyme. Microchemical Journal 177: 107283. https://doi.org/10.1016/j.microc.2022.107283
